# Supplementary material
Source: Springer Nature journal article supplement (https://www.springermedizin.de/resource/supplementary/12936_2013_2671_MOESM17_ESM.pdf/9545084)

DALYs per person and per year

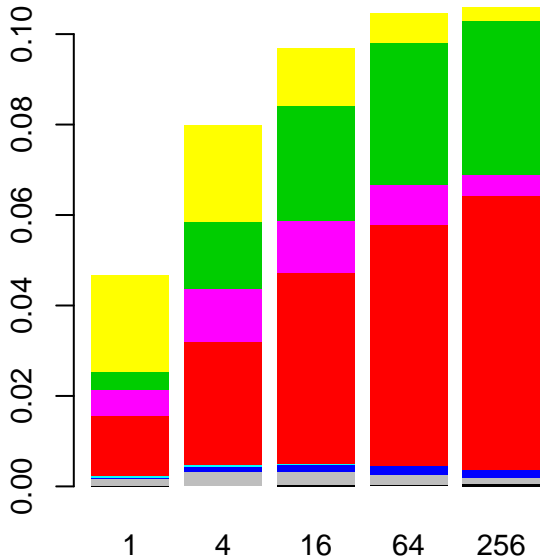

EIR (IBPAPA) on log scale

Supplement: MOESM17 [file 9545084]
